# Supplementary material for: Altered states phenomena induced by visual flicker light stimulation
Source: PubMed Central journal article supplement (PMC8248711; doi:10.1371/journal.pone.0253779), 2021-07-01
Supplement: pone.0253779.s002.pdf [file pone.0253779.s002.pdf]

**Table S1***Content and frequency of each category extracted from retrospective participant reports*

| Superordinate Category            | Extracted Category                                  | Amount<br>Constant Light<br>Session | Amount<br>3 Hz Session | Amount<br>10 Hz Session |
|-----------------------------------|-----------------------------------------------------|-------------------------------------|------------------------|-------------------------|
| Visual impressions<br><br>(Forms) | Circling patterns                                   |                                     | 1                      | 1                       |
|                                   | Change of light                                     | 4                                   | 5                      | 2                       |
|                                   | Colorful afterimage after the<br>termination of FLS | 2                                   |                        |                         |
|                                   | Movement of the room/chair                          | 1                                   | 2                      | 1                       |
|                                   | (Almost) None                                       | 3                                   | 6                      |                         |
|                                   | Tunnel or spiral                                    | 1                                   | 2                      | 1                       |
|                                   | Colors                                              | 10                                  | 10                     | 12                      |
|                                   | Forms or patterns                                   | 5                                   | 9                      | 21                      |
|                                   | Concrete images                                     | 1                                   | 1                      | 3                       |
|                                   | Rasters                                             | 1                                   | 1                      | 2                       |
|                                   | Circles                                             | 2                                   | 1                      | 3                       |
|                                   | Stars                                               | 1                                   |                        | 1                       |
|                                   | Lightning                                           |                                     | 1                      |                         |
|                                   | Wavelike patterns                                   | 1                                   |                        |                         |
|                                   | Light rings                                         |                                     | 1                      |                         |
|                                   | Light points                                        |                                     |                        | 1                       |
|                                   | (Colors)                                            | Heart                               | 1                      |                         |
| Red                               |                                                     | 1                                   | 9                      | 4                       |
| Green                             |                                                     | 1                                   | 1                      | 2                       |
| Blue                              |                                                     | 1                                   | 3                      | 5                       |
| Yellow                            |                                                     | 4                                   | 4                      |                         |
| Orange                            |                                                     | 3                                   | 1                      | 3                       |
| Beige                             |                                                     | 1                                   |                        |                         |
| Purple                            |                                                     |                                     | 1                      |                         |
| Black                             |                                                     |                                     | 2                      | 3                       |
| Grey                              |                                                     |                                     |                        | 1                       |
| White                             |                                                     |                                     | 2                      |                         |
| Thoughts                          | Thoughts about everyday life                        | 8                                   | 6                      |                         |
|                                   | Very few thoughts                                   | 6                                   | 6                      | 4                       |
|                                   | (Day-)dreaming                                      | 3                                   | 1                      | 2                       |
|                                   | Re-experiencing situations                          | 6                                   |                        |                         |
|                                   | Thoughts about problems                             | 1                                   |                        |                         |
|                                   | Finding new ideas and<br>solutions                  | 1                                   |                        | 1                       |
|                                   | Not able to remember specific<br>thoughts           | 1                                   | 1                      | 2                       |

**Table S1***Continued*

| Superordinate Category                               | Extracted Category                       | Amount<br>Constant Light<br>Session | Amount<br>3 Hz Session | Amount<br>10 Hz Session |
|------------------------------------------------------|------------------------------------------|-------------------------------------|------------------------|-------------------------|
| Thoughts (continued)                                 | Interrupted thoughts                     | 1                                   |                        | 1                       |
|                                                      | Problems were less<br>frightening        | 1                                   |                        |                         |
|                                                      | Erotic thoughts                          |                                     | 1                      |                         |
|                                                      | Thinking up stories                      |                                     | 2                      |                         |
|                                                      | Thinking of certain places or<br>persons | 2                                   |                        | 1                       |
|                                                      | Wandering thoughts                       | 1                                   | 2                      | 2                       |
|                                                      | Clearer thoughts                         | 1                                   |                        |                         |
|                                                      | Child's emotion                          | 1                                   |                        |                         |
|                                                      | Seeing thoughts as pictures              |                                     | 1                      |                         |
|                                                      | Excessive stream of thoughts             |                                     | 2                      |                         |
|                                                      | Arousal and emotions                     | Dizziness                           |                        | 3                       |
| Nausea                                               |                                          |                                     | 1                      |                         |
| Restlessness                                         |                                          |                                     | 2                      | 2                       |
| Tiredness                                            |                                          | 11                                  | 4                      | 4                       |
| Wakefulness                                          |                                          | 3                                   | 1                      | 1                       |
| (Feeling like) falling asleep                        |                                          | 12                                  | 5                      | 4                       |
| Relaxation                                           |                                          | 12                                  | 13                     | 9                       |
| Compulsion to move                                   |                                          | 1                                   | 1                      |                         |
| Unpleasant Feeling                                   |                                          | 1                                   | 4                      | 9                       |
| Feeling safe                                         |                                          | 4                                   |                        |                         |
| Feeling concentrated after the<br>termination of FLS |                                          | 1                                   |                        |                         |
| Feeling spaced out after the<br>termination of FLS   |                                          | 1                                   |                        | 1                       |
| Habituation to the (flicker)<br>light during session |                                          | 6                                   | 9                      | 12                      |
| Trancelike/meditative state                          |                                          | 3                                   | 1                      | 1                       |
| Liberating feeling                                   |                                          | 1                                   |                        | 1                       |
| Sadness                                              |                                          | 1                                   |                        |                         |
| Bodily perceptions                                   | Tingling                                 | 1                                   | 1                      |                         |
|                                                      | Limbs felt paralyzed                     |                                     |                        | 1                       |
|                                                      | Convulsions                              |                                     | 1                      | 1                       |
|                                                      | Twitch of the eyes                       | 2                                   | 2                      | 3                       |
|                                                      | Watery eyes                              |                                     | 1                      | 1                       |
|                                                      | Itchy eyes                               |                                     |                        | 1                       |
|                                                      | Decrease in bodily perception            | 1                                   |                        |                         |
|                                                      | Bodily awareness                         | 1                                   |                        |                         |
|                                                      | Body felt heavy                          |                                     | 2                      | 1                       |
|                                                      | Feeling of being able to leave<br>body   |                                     | 1                      |                         |
|                                                      | Feeling of floating                      | 1                                   |                        |                         |

**Table S1***Continued*

| Superordinate Category    | Extracted Category                 | Amount<br>Constant Light<br>Session | Amount<br>3 Hz Session | Amount<br>10 Hz Session |
|---------------------------|------------------------------------|-------------------------------------|------------------------|-------------------------|
| Perception of temperature | Warmth                             | 10                                  | 1                      |                         |
|                           | Coldness to the end of the session | 1                                   | 1                      |                         |
| Time and space perception | Altered time perception            | 1                                   | 3                      | 1                       |
|                           | Altered space perception           |                                     | 2                      |                         |
| Associations              | Sunlight                           | 7                                   | 2                      |                         |
|                           | Rollercoaster                      |                                     |                        | 2                       |
|                           | Outer space                        |                                     | 1                      |                         |
|                           | Moving spotlight                   |                                     | 1                      |                         |
| Other                     | Better perception of sound         | 1                                   |                        |                         |

*Note.* For each session, the number of participants whose reported experiences were classified into the extracted categories is given. Categories are divided into superordinate categories representing the aspect affected by the experience. The superordinate category ‘Visual alterations’ is further divided into more specific visual perceptions.
