# Supplementary material for: Altered states phenomena induced by visual flicker light stimulation
Source: PubMed Central journal article supplement (PMC8248711; doi:10.1371/journal.pone.0253779), 2021-07-01
Supplement: pone.0253779.s003.pdf [file pone.0253779.s003.pdf]

**Table S2**

*Correlations of personality traits (NEO-FFI-2 and TAS) with G-ASC scores (5D-ASC)*

| Personality Trait      | 3 Hz                   |          |           |          | 10 Hz                  |          |           |          |
|------------------------|------------------------|----------|-----------|----------|------------------------|----------|-----------|----------|
|                        | Correlation with G-ASC | <i>t</i> | <i>df</i> | <i>p</i> | Correlation with G-ASC | <i>t</i> | <i>df</i> | <i>p</i> |
| Absorption             | 0.61                   | 3.59     | 22        | .002     | 0.68                   | 4.32     | 22        | .001     |
| Neuroticism            | 0.18                   | 0.87     | 22        | .395     | 0.15                   | 0.70     | 22        | .490     |
| Extraversion           | -0.09                  | -0.43    | 22        | .674     | 0.21                   | 0.99     | 22        | .335     |
| Openness to Experience | 0.22                   | 1.06     | 22        | .300     | 0.47                   | 2.51     | 22        | .020     |
| Agreeableness          | -0.02                  | -0.11    | 22        | .915     | 0.10                   | 0.46     | 22        | .651     |
| Conscientiousness      | -0.04                  | -0.20    | 22        | .843     | -0.06                  | -0.29    | 22        | .776     |

*Note.* Pearson product-moment correlations were calculated between the global G-ASC score of the Altered States of Consciousness (ASC) Rating Scale (5D-ASC; Dittrich, Lamparter, & Maurer, 2006) in the 3 Hz FLS condition and the 10 Hz FLS condition with the personality trait Absorption, as assessed with the Tellegen Absorption Scale (TAS; Tellegen & Atkinson, 1974), and the Big Five personality traits, as assessed with the NEO-FFI-2 (Costa & McCrae, 1989).
