# Supplementary material for: Altered states phenomena induced by visual flicker light stimulation
Source: PubMed Central journal article supplement (PMC8248711; doi:10.1371/journal.pone.0253779), 2021-07-01
Supplement: pone.0253779.s004.pdf [file pone.0253779.s004.pdf]

**Table S3**

*Correlations of personality traits (NEO-FFI-2 and TAS) with Altered State of Awareness scores (PCI)*

| Personality Trait      | 3 Hz                                        |          |           |          | 10 Hz                                       |          |           |          |
|------------------------|---------------------------------------------|----------|-----------|----------|---------------------------------------------|----------|-----------|----------|
|                        | Correlation with Altered State of Awareness | <i>t</i> | <i>df</i> | <i>p</i> | Correlation with Altered State of Awareness | <i>t</i> | <i>df</i> | <i>p</i> |
| Absorption             | 0.32                                        | 1.60     | 22        | .123     | 0.39                                        | 1.96     | 22        | .062     |
| Neuroticism            | -0.09                                       | -0.43    | 22        | .670     | 0.03                                        | 0.14     | 22        | .891     |
| Extraversion           | 0.32                                        | 1.58     | 22        | .129     | 0.13                                        | 0.62     | 22        | .540     |
| Openness to Experience | 0.05                                        | 0.22     | 22        | .828     | 0.10                                        | 0.46     | 22        | .649     |
| Agreeableness          | -0.12                                       | -0.58    | 22        | .570     | 0.06                                        | 0.30     | 22        | .768     |
| Conscientiousness      | -0.04                                       | -0.17    | 22        | .864     | -0.18                                       | -0.86    | 22        | .398     |

*Note.* Pearson product-moment correlations were calculated for the major dimension Altered States of Awareness of the Phenomenology of Consciousness Inventory (PCI; Pekala, 1991) in the 3 Hz FLS condition and the 10 Hz FLS condition with the personality traits Absorption, as assessed with the Tellegen Absorption Scale (TAS; Tellegen & Atkinson, 1974), and the Big Five personality traits, as assessed with the NEO-FFI-2 (Costa & McCrae, 1989).
