# Supplementary material for: Altered states phenomena induced by visual flicker light stimulation
Source: PubMed Central journal article supplement (PMC8248711; doi:10.1371/journal.pone.0253779), 2021-07-01
Supplement: pone.0253779.s005.pdf [file pone.0253779.s005.pdf]

**Table S4**

*Correlations of personality traits (NEO-FFI-2 and TAS) with Absorption scores (PCI)*

| Personality Trait      | 3 Hz                        |          |           |          | 10 Hz                       |          |           |          |
|------------------------|-----------------------------|----------|-----------|----------|-----------------------------|----------|-----------|----------|
|                        | Correlation with Absorption | <i>t</i> | <i>df</i> | <i>p</i> | Correlation with Absorption | <i>t</i> | <i>df</i> | <i>p</i> |
| Absorption             | 0.34                        | 1.69     | 22        | .105     | 0.44                        | 2.28     | 22        | .033     |
| Neuroticism            | 0.36                        | 1.80     | 22        | .086     | 0.00                        | 0.00     | 22        | 1        |
| Extraversion           | -0.26                       | -1.26    | 22        | .220     | 0.18                        | 0.85     | 22        | .404     |
| Openness to Experience | 0.33                        | 1.63     | 22        | .117     | 0.19                        | 0.93     | 22        | .363     |
| Agreeableness          | -0.04                       | -0.18    | 22        | .858     | 0.27                        | 1.32     | 22        | .200     |
| Conscientiousness      | -0.24                       | -1.15    | 22        | .261     | 0.02                        | 0.11     | 22        | .915     |

*Note.* Pearson product-moment correlations were calculated for the minor dimension Absorption of the Phenomenology of Consciousness Inventory (PCI; Pekala, 1991) in the 3 Hz FLS condition and the 10 Hz FLS condition with the personality traits Absorption, as assessed with the Tellegen Absorption Scale (TAS; Tellegen & Atkinson, 1974), and the Big Five personality traits, as assessed with the NEO-FFI-2 (Costa & McCrae, 1989).
